# Supplementary material for: Deep-Learning Assessed Muscular Hypodensity Independently Predicts Mortality in DLBCL Patients Younger Than 60 Years
Source: MDPI journal article supplement (doi:10.3390/cancers13184503), 2021-09-07
Supplement: s1 [file s1]

### Supplementary data

**Table S1. Patients characteristic in the training, testing and exploratory sets.**

|                                        | Training set       | Testing set        | Exploratory set    |
|----------------------------------------|--------------------|--------------------|--------------------|
| n                                      | 190                | 49                 | 656                |
| age (years)                            | 54.0 (46.0 - 59.0) | 48.0 (42.0 - 56.0) | 48.0 (37.7 - 55.0) |
| female, n (%)                          | 67 (35.3%)         | 16 (32.7%)         | 289 (44.1%)        |
| neoplasia                              |                    |                    |                    |
| DLBCL, n(%)                            | 90 (47.4%)         | 49 (100%)          | 656 (100%)         |
| MCL, n(%)                              | 100 (52.6%)        | -                  | -                  |
| BMI (kg/m <sup>2</sup> )               | 25.6 (22.3 - 28.1) | 23.3 (21.0 - 25.7) | 24.1 (21.8 - 27.7) |
| SMI (cm <sup>2</sup> /m <sup>2</sup> ) | 52.5 (45.6 - 58.7) | 49.1 (44.8 - 57.4) | 50.3 (44.6 - 57.2) |
| MA (HU)                                | 34.9 (29.9 - 39.9) | 38.6 (33.4 - 42.5) | 36.1 (30.4 - 42.0) |

DLBCL diffuse large B cell lymphoma; MCL mantle cell lymphoma; BMI body mass index; SMI skeletal muscle index; MA muscle attenuation. Unless otherwise stated, numbers are given as median (IQR).

**Table S2. Causes of death in the exploratory set.**

| Cause              | Muscular hypodensity<br>(n=65) |                | Control<br>(n=591) |               | p            |
|--------------------|--------------------------------|----------------|--------------------|---------------|--------------|
| Lymphoma           | 6                              | (9.2%)         | 39                 | (6.6%)        | 0.43         |
| Toxicity           | 4                              | (6.2%)         | 11                 | (1.9%)        | 0.05         |
| Concurrent illness | 3                              | (4.6%)         | 5                  | (0.8%)        | 0.03         |
| Other reason       | 1                              | (1.5%)         | 3                  | (0.5%)        | 0.34         |
| Unknown            | 1                              | (1.5%)         | 0                  | (0.0%)        | 0.10         |
| <b>Total</b>       | <b>15</b>                      | <b>(23.1%)</b> | <b>58</b>          | <b>(9.8%)</b> | <b>0.003</b> |

Numbers are given as n(%).

**Table S3. Performances of previously published neural networks.**

| Study                | Training<br>sample, n | Validation<br>sample, n | Dice               |
|----------------------|-----------------------|-------------------------|--------------------|
| Burns et al.         | 51                    | 51                      | 0.94 ± 0.03        |
| Lee et al.           | 250                   | 150                     | 0.93 ± 0.02        |
| Edwards et al.       | 682                   | 137                     | 0.92 ± 0.02        |
| Dabiri et al.        | 3774                  | 1327                    | 0.99 ± 0.01        |
| <b>Present study</b> | <b>190</b>            | <b>49</b>               | <b>0.97 ± 0.03</b> |

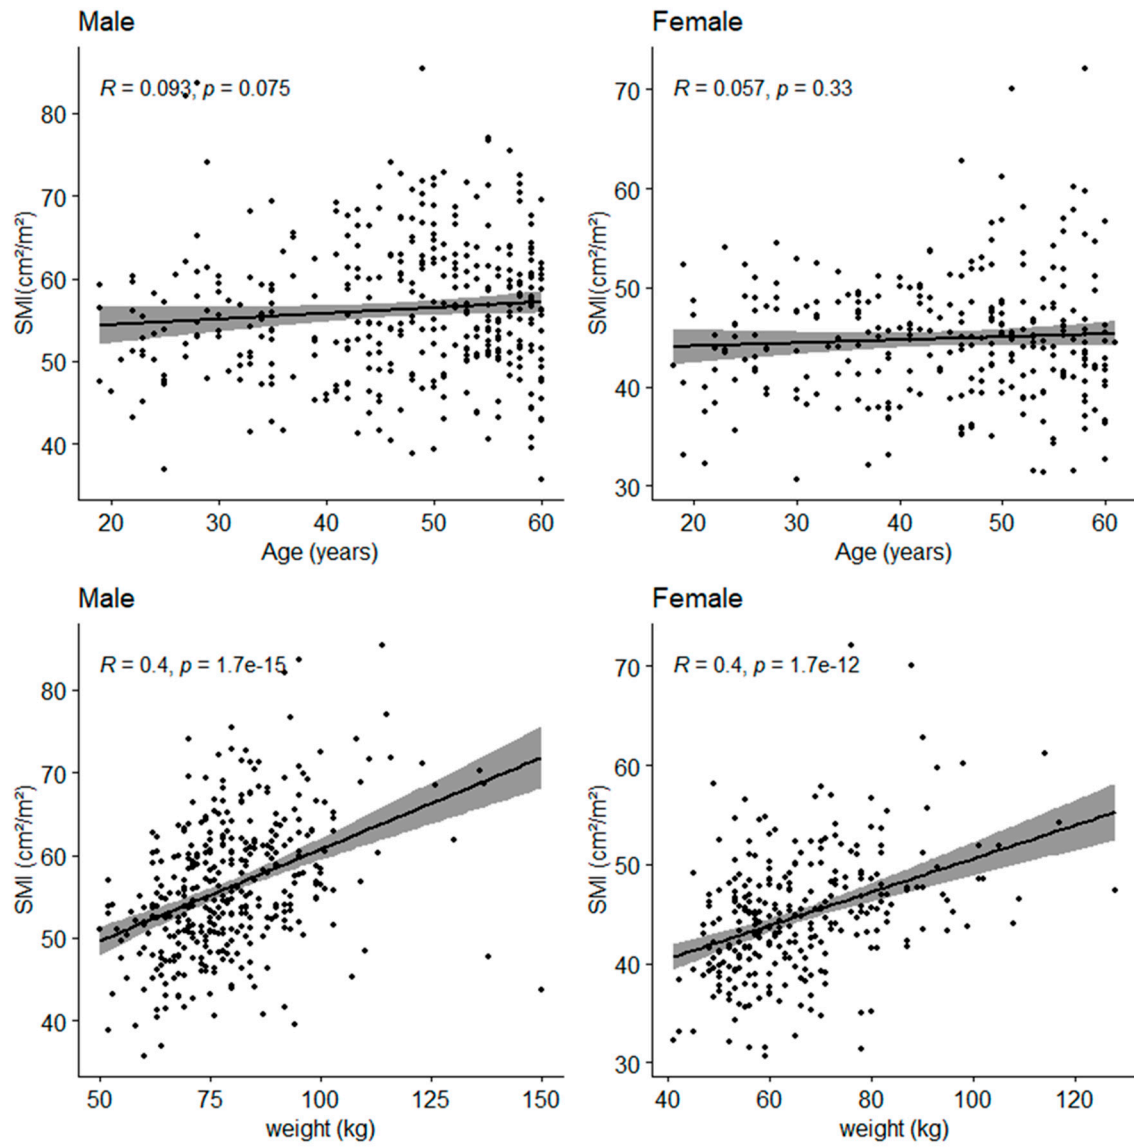

**Figure S1. Correlations of SMI with age and weight.**

SMI skeletal muscle index; body mass index.

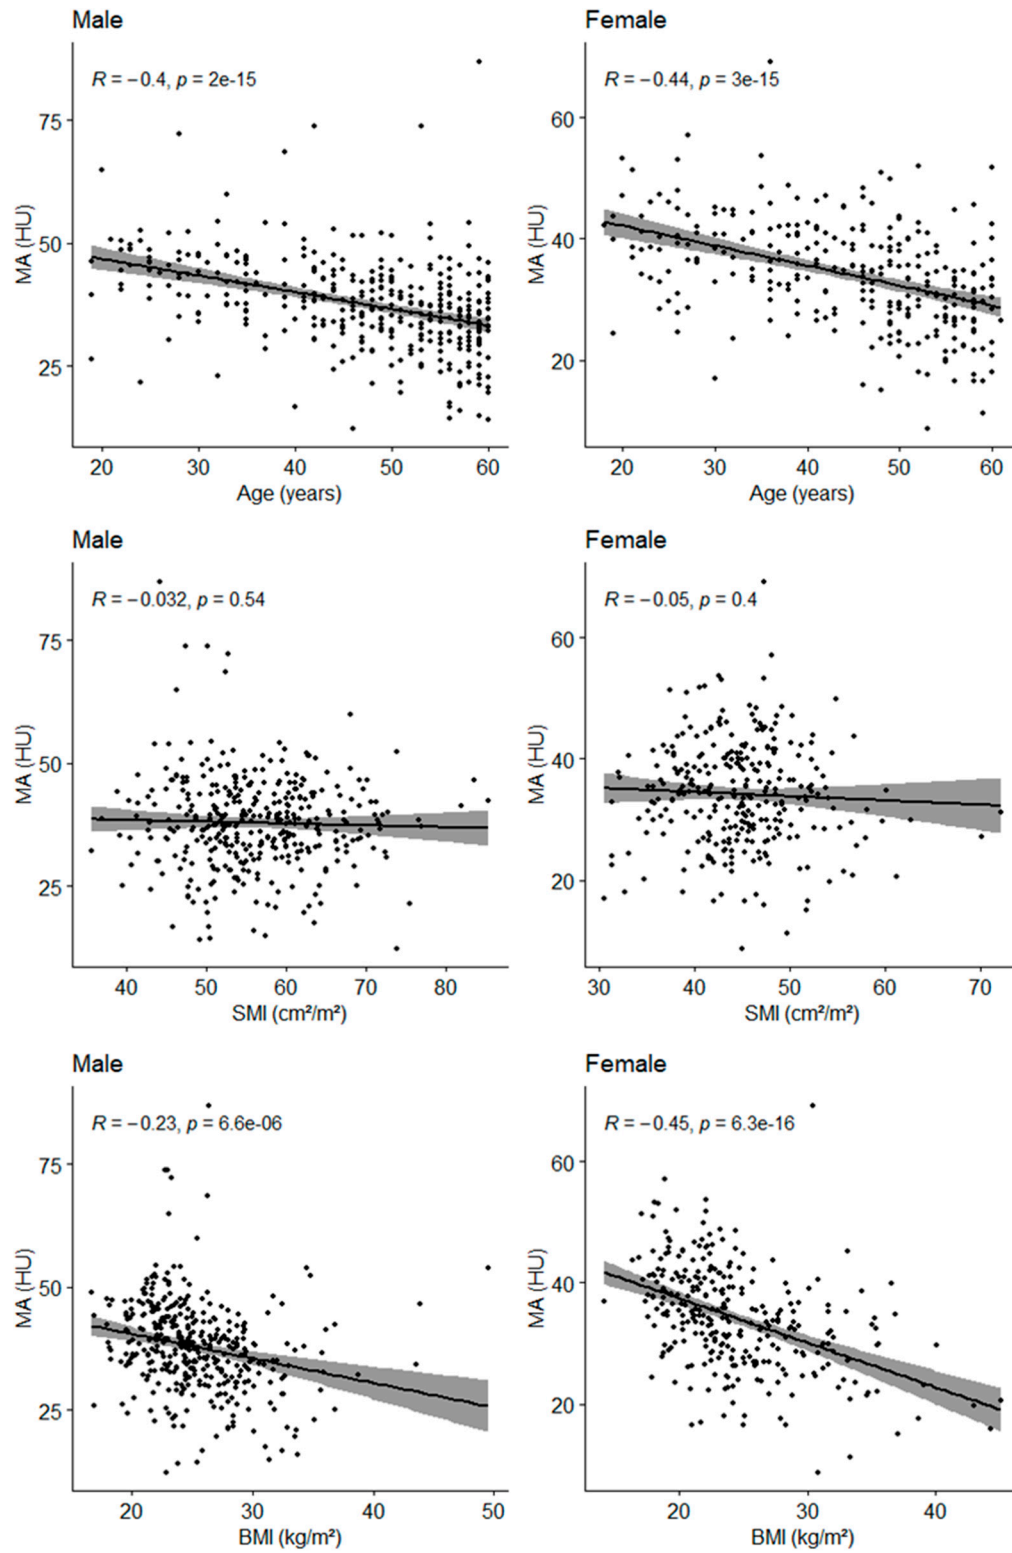

**Figure S2. Correlation of MA with age, SMI and BMI**

MA muscle attenuation; SMI skeletal muscle index; BMI body mass index.

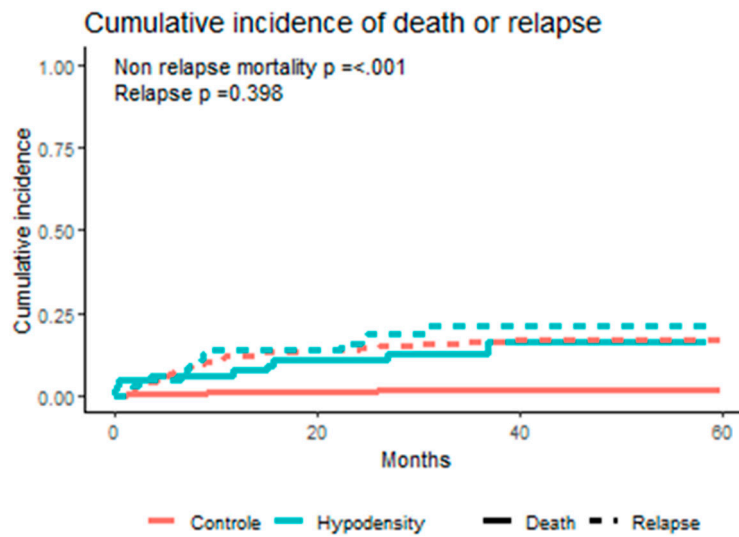

36M NRM :  $12.7 \pm 1.8\%$  vs  $2.0 \pm 0.0$ ,  $p < 0.001$

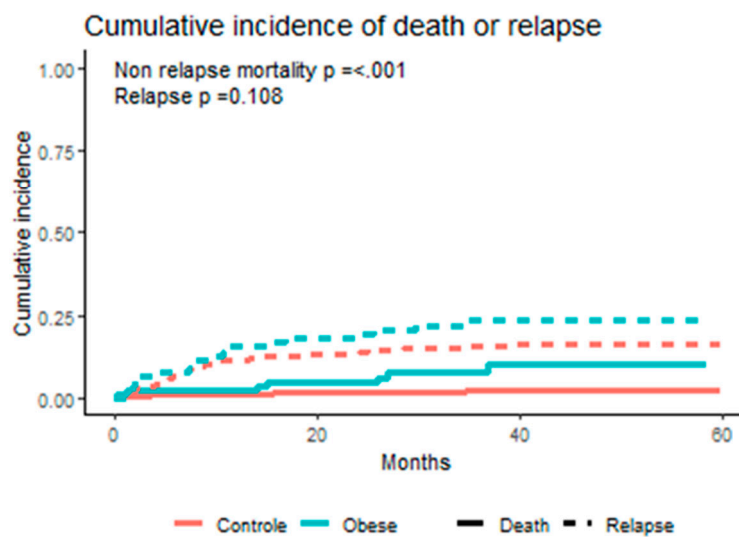

36M NRM :  $8.1 \pm 0.9\%$  vs  $2.2 \pm 0.0$ ,  $p < 0.001$

Figure S3. Cumulative incidence of death or relapse according to muscular hypodensity or obesity.  
NRM non relapse mortality.
